# Supplementary material for: Secular Trends in Physical Fitness of Children and Adolescents: A Review of Large-Scale Epidemiological Studies Published after 2006
Source: MDPI journal article supplement (doi:10.3390/ijerph17165671), 2020-08-05
Supplement: s1 [file s1]

Search: ((**children OR adolescent\* OR youth OR child OR Kinder OR Jugendliche**)  
**AND (cohort stud\* OR Kohortenstudie\* OR survey OR longitudinal OR trend\***  
**OR secular OR follow-up)) AND ("Motor performance" OR "motorische**  
**Leistungsfähigkeit" OR "physical fitness" OR fitness) Filters: English, from 2006 -**  
**2020**

((((((((((("child"[MeSH Terms] OR "child"[All Fields]) OR "children"[All Fields]) OR "child  
s"[All Fields]) OR "children s"[All Fields]) OR "childrens"[All Fields]) OR "childs"[All  
Fields]) OR "adolescent\*"[All Fields]) OR (((("adolescent"[MeSH Terms] OR  
"adolescent"[All Fields]) OR "youth"[All Fields]) OR "youths"[All Fields]) OR "youth  
s"[All Fields])) OR ((((((("child"[MeSH Terms] OR "child"[All Fields]) OR "children"[All  
Fields]) OR "child s"[All Fields]) OR "children s"[All Fields]) OR "childrens"[All Fields])  
OR "childs"[All Fields])) OR "Kinder"[All Fields]) OR "Jugendliche"[All Fields]) AND  
((((((((((((("cohort studies"[MeSH Terms] OR ("cohort"[All Fields] AND "studies"[All  
Fields])) OR "cohort studies"[All Fields]) OR "cohort"[All Fields]) OR "cohort s"[All  
Fields]) OR "cohorte"[All Fields]) OR "cohorts"[All Fields]) AND "stud\*"[All Fields]) OR  
"kohortenstudie\*"[All Fields]) OR ((((((("survey s"[All Fields] OR "surveyed"[All Fields])  
OR "surveying"[All Fields]) OR "surveys and questionnaires"[MeSH Terms]) OR  
("surveys"[All Fields] AND "questionnaires"[All Fields])) OR "surveys and  
questionnaires"[All Fields]) OR "survey"[All Fields]) OR "surveys"[All Fields])) OR  
("longitudinal"[All Fields] OR "longitudinally"[All Fields])) OR "trend\*"[All Fields]) OR  
(((((((("secular"[All Fields] OR "secularism"[MeSH Terms]) OR "secularism"[All Fields])  
OR "secularity"[All Fields]) OR "secularization"[All Fields]) OR "secularized"[All Fields])  
OR "secularizing"[All Fields]) OR "seculars"[All Fields])) OR "follow-up"[All Fields]))  
AND (((("Motor performance"[All Fields] OR ("motorische"[All Fields] AND  
"leistungsfähigkeit"[All Fields])) OR "physical fitness"[All Fields]) OR ("fitness"[All  
Fields] OR "fitnesses"[All Fields]))

### **Translations**

**children:** "child"[MeSH Terms] OR "child"[All Fields] OR "children"[All Fields] OR  
"child's"[All Fields] OR "children's"[All Fields] OR "childrens"[All Fields] OR "childs"[All  
Fields]

**youth:** "adolescent"[MeSH Terms] OR "adolescent"[All Fields] OR "youth"[All Fields]  
OR "youths"[All Fields] OR "youth's"[All Fields]

**child:** "child"[MeSH Terms] OR "child"[All Fields] OR "children"[All Fields] OR  
"child's"[All Fields] OR "children's"[All Fields] OR "childrens"[All Fields] OR "childs"[All  
Fields]

**cohort:** "cohort studies"[MeSH Terms] OR ("cohort"[All Fields] AND "studies"[All  
Fields]) OR "cohort studies"[All Fields] OR "cohort"[All Fields] OR "cohort's"[All Fields]  
OR "cohorte"[All Fields] OR "cohorts"[All Fields]

**survey:** "survey's"[All Fields] OR "surveyed"[All Fields] OR "surveying"[All Fields] OR  
"surveys and questionnaires"[MeSH Terms] OR ("surveys"[All Fields] AND  
"questionnaires"[All Fields]) OR "surveys and questionnaires"[All Fields] OR  
"survey"[All Fields] OR "surveys"[All Fields]

**longitudinal:** "longitudinal"[All Fields] OR "longitudinally"[All Fields]

**secular:** "secular"[All Fields] OR "secularism"[MeSH Terms] OR "secularism"[All Fields]  
OR "secularity"[All Fields] OR "secularization"[All Fields] OR "secularized"[All Fields]  
OR "secularizing"[All Fields] OR "seculars"[All Fields]  
**fitness:** "fitness"[All Fields] OR "fitnesses"[All Fields]
