# Supplementary material for: Secular Trends in Physical Fitness of Children and Adolescents: A Review of Large-Scale Epidemiological Studies Published after 2006
Source: MDPI journal article supplement (doi:10.3390/ijerph17165671), 2020-08-05
Supplement: s1 [file s1]

[illegible]

|    |                                                                                                                                                                                                                                                                         |                 |                 |                 |                 |                 |                 |               |                 |                 |                 |                 |                 |
|----|-------------------------------------------------------------------------------------------------------------------------------------------------------------------------------------------------------------------------------------------------------------------------|-----------------|-----------------|-----------------|-----------------|-----------------|-----------------|---------------|-----------------|-----------------|-----------------|-----------------|-----------------|
| Q2 | Were the study participants aware of the research question?<br>1 yes<br>2 no<br>3 can't tell                                                                                                                                                                            | 3               | 3               | 3               | 3               | 3               | 3               | 3             | 3               | 3               | 3               | 3               | 3               |
| E  | <b>Data collection methods</b>                                                                                                                                                                                                                                          | <b>strong</b>   | <b>strong</b>   | <b>strong</b>   | <b>strong</b>   | <b>strong</b>   | <b>strong</b>   | <b>strong</b> | <b>strong</b>   | <b>strong</b>   | <b>strong</b>   | <b>strong</b>   | <b>strong</b>   |
| Q1 | Were data collection tools shown to be valid?<br>1 yes<br>2 no<br>3 can't tell                                                                                                                                                                                          | 1               | 1               | 1               | 1               | 1               | 1               | 1             | 1               | 1               | 1               | 1               | 1               |
| Q2 | Were data collection tools shown to be reliable?<br>1 yes<br>2 no<br>3 can't tell                                                                                                                                                                                       | 1               | 1               | 1               | 1               | 1               | 1               | 1             | 1               | 1               | 1               | 1               | 1               |
| F  | <b>Withdrawals and drop-outs</b>                                                                                                                                                                                                                                        | <b>Weak</b>     | <b>weak</b>     | <b>weak</b>     | <b>weak</b>     | <b>weak</b>     | <b>weak</b>     | <b>strong</b> | <b>weak</b>     | <b>weak</b>     | <b>weak</b>     | <b>weak</b>     | <b>weak</b>     |
| Q1 | Were withdrawals and drop-outs reported in terms of numbers and/or reasons per group?<br>1 yes<br>2 no<br>3 can't tell<br>4 not applicable (i.e. one time surveys or interviews)                                                                                        | 2               | 2               | 2               | 2               | 2               | 2               | 1             | 1               | 2               | 2               | 2               | 2               |
| Q2 | Indicate the percentage of participants completing the study. (if the percentage differs by groups, record the lowest).<br>1 80-100% agreement<br>2 60-79% agreement<br>3 less than 60% agreement<br>4 can't tell<br>5 not applicable (i.e. retrospective case-control) | 4               | 4               | 4               | 4               | 4               | 4               | 1             | 3               | 4               | 4               | 4               | 4               |
|    | <b>GLOBAL RATING</b>                                                                                                                                                                                                                                                    | <b>moderate</b> | <b>moderate</b> | <b>moderate</b> | <b>moderate</b> | <b>moderate</b> | <b>moderate</b> | <b>strong</b> | <b>moderate</b> | <b>moderate</b> | <b>moderate</b> | <b>moderate</b> | <b>moderate</b> |

[illegible]

[illegible]

Summary: 2 strong [27]; [30]

21 moderate: [44]; [40]; [24]; [25]; [26]; [45]; [28]; [42]; [43]; [29]; [46]; [41]; [32; [33]; [34]; [35]; [36]; [37]; [38]; [14]; [39]

1 weak: [31]
